# Supplementary material
Source: publisher site journal article supplement (https://www.dovepress.com/article/495259)
Supplement: Supplementary file 1 [file get_supplementary_file.php]

Supplementary Materials


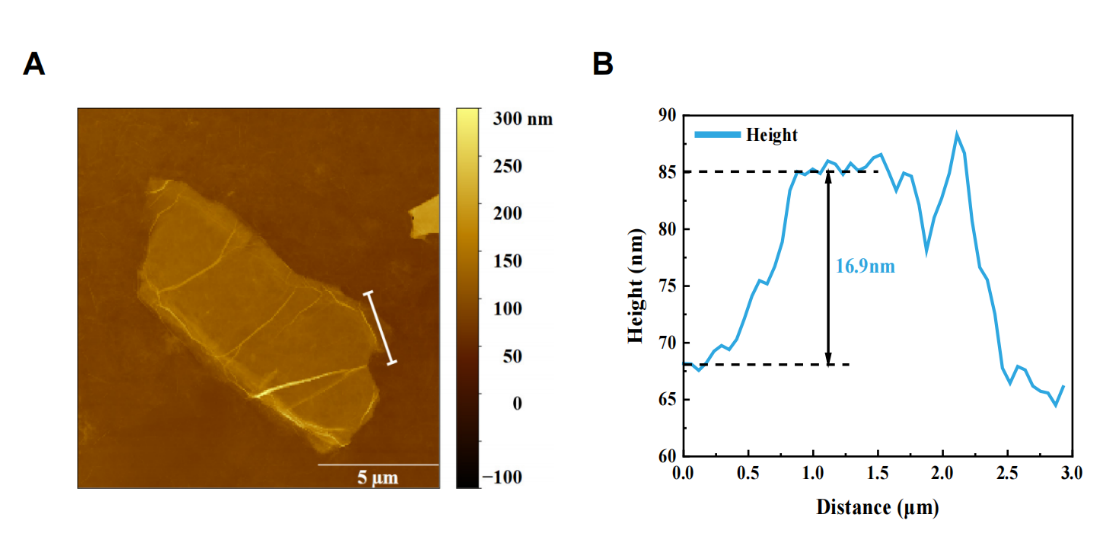


**Figure S1.** AFM analysis of GO nanosheet morphology. (A) AFM image of a GO nanosheet. (B) Size and height profile distribution of the delineated portion of GO nanosheets in (A).


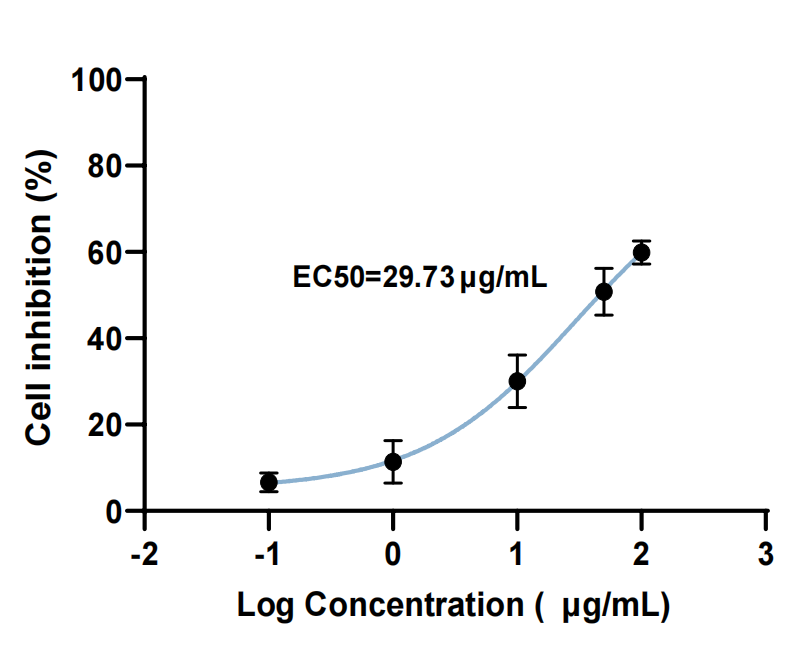


**Figure S2.** The 72h-EC50 value of GO nanosheets.


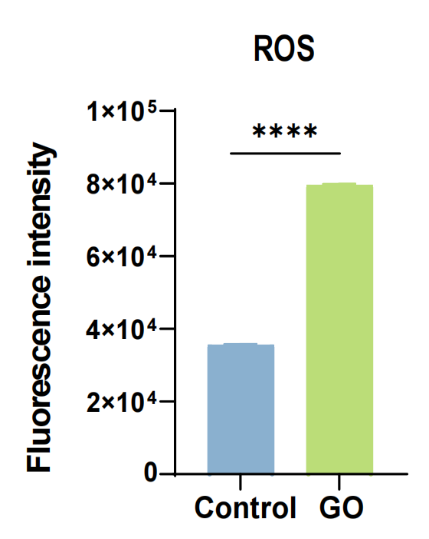


**Figure S3.** ROS levels in KGN cells of the GO nanosheet-treated group were quantified using a microplate reader (n=3). Data are expressed as Mean ± SEM and statistical differences between experimental groups were analyzed by the student t-test. *****p* < 0.0001.
